# Supplementary material for: Characterization and operation of a multi-channel Condensation Particle Counter (mc-CPC) for aircraft-based measurements
Source: Copernicus journal article supplement (doi:10.5194/egusphere-2025-4349), 2025-09-17
Supplement: Supplementary file [file egusphere-2025-4349-AC1-supplement.pdf]

Characterization and operation of a multi-channel Condensation Particle Counter (mc-CPC) for aircraft-based measurements, S. Richter et. al

### Author comments to reviewer #1

5 *The comments of the reviewer are depicted in black and italics.*

Our answers to the reviewer comments are written in green color.

Changes in the revised version of the manuscript are given in red color.

### Referee comment #1

10 *This paper presents a description of an aircraft-based, multi-channel condensation particle counter (mc-CPC) used for investigating the new particle formation (NPF) in the UTLS. They provide a detailed description of the system design and the careful, comprehensive calibrations, with an example of in-flight data from the TPEx campaign on tropopause composition in 2024. This mc-CPC system was developed by integrating three commercial GRIMM SKY-CPCs with*  
15 *a custom-built pressure regulation and flow manifold for aircraft-based measurements. FC-43 was used as the working fluid, which, according to the authors, was tested for the first time on Grimm SKY-CPC. The mc-CPC system consists of three channels to provide two size cuts, ~11-12 nm (chan1 and chan2) and ~15 nm (chan3). The counting efficiency of the CPC was corrected for flow and pressure, but not for the particle loss through the inlet and sampling*  
20 *line. The comparative use of the two size cuts from the mc-CPC (i.e., the difference between the particle number concentrations of the low and high size cuts) provides identification of NPF events.*

We thank the reviewer for the detailed and comprehensive comments, which are very valuable and will improve the manuscript.

25 **Main comments:**

1. *Wording of “construct”. “We constructed a multi-channel condensation particle counter.” I am not sure if the wording of “construct” is entirely accurate here. It seems more like a custom integration built around commercial CPC units.*

30 We agree that the word ‘construct’ is not really accurate. We therefore changed the manuscript accordingly. The lines listed below refer to the revised version.

Line 12 & Line 702: changed ‘constructed’ to ‘set up’.

Line 76-79: Using a similar approach, we set up a custom integration of three commercial CPC units for aircraft applications. The three channels of the multi-channel Condensation Particle Counter (mc-CPC) are currently operated with FC-43 (Fluorinert) as the working fluid and  
35 provide two different cutoffs by adjusting the internal CPC temperatures.

Line 82: changed ‘construction’ to ‘design’.

Line 87: Deleted ‘construction of the’.

Line 13, 87 and 141: Added ‘commercial’ in front of ‘CPC’.

40 2. *The biased particle concentration is a concern. The absolute particle number  
concentration from mc-CPC cannot reflect the true ambient values because the particle  
loss in the inlet and tubing is not corrected. The authors have attempted to estimate the  
particle loss during NPF events, but because the particle size distribution is unknown,  
the actual concentrations are still quite uncertain. The particle concentration of the two  
45 size cuts can be used comparatively for NPF event identification, because all CPCs  
share the same common inlet and sampling line. However, the loss of particles is heavily  
dependent on their size, especially for particles smaller than 20nm; as a result, the  
errors in absolute concentration between the two size cuts could bias the identification  
of NPF events.*

50 We agree that a proper correction to derive the ambient number concentration is not possible  
because the size distributions are not known. We are nevertheless convinced that the particle  
losses do not strongly affect the validity of the NPF identification. First, the particle losses for  
the small and the large channel are comparable because they share the same inlet (26% for 11  
nm and 20% for 15 nm-sized particles). Furthermore, the diffusion losses for particles of 11 nm  
55 are higher than for the 15 nm particles. This means, that by not accounting for the differences  
in size-dependent inlet line losses we rather underestimate the differences between the two  
channels, which means that the NPF criteria we use is even more conservative. To make this  
clearer we added the following paragraph in section 5, line 667:

60 As we could not perform a quantitative particle loss correction because of the unknown size  
distribution, the measured concentrations represent lower limits of the ambient aerosol  
concentration. Nevertheless, as all channels are subject to similar particle losses due to their  
common inlet, the identification of NPF events should not be affected strongly. Furthermore,  
the general concentration range and relative trends of the total concentration are well  
represented by the measurements.

65 3. *The size cut for “recent NPF events.” The motivation of the mc-CPC is to investigate  
the NPF events in the UTLS, which, in this study, are identified by the difference in  
particle number concentrations between the lower size cut and higher size cut (12-15  
nm). Can 12-15 nm (instead of sub-10 nm) be used to identify “recent NPF” (line 240)?  
Or maybe this is just another wording issue with the word “recent”.*

70 We agree, freshly formed particles have to grow to sizes that are detectable by our instrument  
(~11 nm). The time it takes to grow to a detectable size depends on the average growth rate.  
These growth rates can be quite variable. For growth rates of ~ 9 nm/h as observed during  
strong upper tropospheric NPF events by Curtius et al. (2024), we would be able to detect an  
NPF event that happened a bit more than ~ 1 hour ago. The average growth rate after NPF  
depends on various atmospheric conditions and substantially lower growth rates are  
75 conceivable as well (e.g. Kupc et al., 2020). However, we believe that in the time frame of a  
few hours the word ‘recent’ is appropriate and we would therefore prefer not change the  
wording in the revised version. We nevertheless adjusted the paragraph to make this clearer  
(line 247):

(...) which most likely have formed by recent NPF a few hours ago. Note that growth rates in the UT are highly variable and therefore the time between fresh nucleation and our measurements can differ.

4. *The normalized counting efficiency and data correction. The normalized counting efficiency was shown in the manuscript to illustrate the instrument/channel comparison. However, the manuscript didn't explicitly state whether the raw/absolute counting efficiency was used for in-flight data correction. There needs to be some statement to clarify this.*

We suppose you mean the characterization that we performed for different internal and external pressures and the resulting change in the counting efficiency (4.4). Yes, the in-flight data has been corrected for this offset. Therefore, we added a paragraph at the end of this section (line 575 in the revised version).

For our aircraft measurements, this means that varying altitudes do not alter the cutoff but the plateau efficiency changes slightly with altitude. Hence, the measurement data of the research flight presented in section 5 were corrected by the raw counting efficiency according to the pCPC and the ambient pressure  $p_{\text{external}}$  (see Fig. G1 for the summarized data).

5. *The Correction factor at 200 hpa (Pcpc). The internal pressure of the CPC (Ppcp) ranges from 200 hpa up to 750 hpa. However, the sample flow at 200 hpa is lower than that at higher pressures, particularly for  $FF > 1.5$  (line 743-744, Fig. B1). In the manuscript, the author stated that they cannot explain this behavior and did not account for these lower flows in the correction factor. However, the mc-CPC was operated at ~ 200 hpa for most of the time (i.e., RF04). If 200 hpa is a typical operating pressure for mc-CPC, and the outstanding flow behavior at 200 hpa is consistent, it needs further investigation and should not be simply ignored.*

We thank the reviewer for this comment. We agree that the lower sample flows observed at pCPC 200 hPa needs further investigation. We would like to emphasize that we did not intend to ignore the observed behavior and that we pointed it out in line 741 (line 815 in the revised version). We repeated measurements at pCPC = 200 hPa several times at different days and the behavior was unfortunately inconclusive: sometimes the correct flow of 0.6 lpm was observed (fitting perfectly to the flows at higher pressures) and sometimes lower flow rates occurred. The flows shown in Fig. C1 show the average of these measurements. We do not see a reason for the changing flows and are convinced that this is most likely an artifact of the flow measurements. To make this clearer we added a paragraph to Appendix C.

Line 816: The flows for pCPC = 200 hPa as depicted in Fig C1 are lower than the 0.6 lpm that were observed for higher values of pCPC. The measurements shown represent an average of several measurements, and for some measurements also a flow of 0.6 lpm was observed, as expected. We think that the sometimes lower flows are actually an artefact, but we were not able to fully resolve this issue with the available instrumentation. Still, this issue needs further investigation in the future.

6. *The manuscript could benefit from being more focused and concise, emphasizing the key points and minimizing redundancy.*

We agree that the manuscript is fairly long and has some redundancies. To address the reviewers comment we deleted or rephrased text:

125 Deleted text:

Line 196: The inlet flow (...)

Line 317: The comparison of these two parameters (...)

Line 436: To examine (...)

Line 483: We will use cutoff diameters (...)

130 Line 586: An aerosol number concentration correction (...) → added text to 577

Line 604: These values represent mean values (...) → added to Fig. 8 description

For more, please see the revised manuscript.

Rephrased text:

135 Line 192: The high flow rates that the IDP-3 pump had to provide during TPEX caused some difficulties (...)

Line 503: By increasing  $p_{CPC}$  to 700 hPa we possibly also decreased the diffusion of FC-43 into the center of the saturator, which consequently could have had an unfavorable effect on the particle activation.

140 Line 564: (...) while the deviations for channel 2 and 3 were somewhat larger, ranging from 12 nm to 12.6 nm and from 14.7 nm to 15.2 nm, respectively, which is still within their uncertainty.

For changes in section 4.2 and 4.3 please see the revised version.

## Other comments

- 145 1. Need to keep consistency for the use of terms "NMP", "NMPs", and "nucleation mode particles". For example, line 56 uses both NMP and nucleation mode particles.

For the revised manuscript we changed the abbreviation NMP into NMPs, because we only refer to them in the plural form.

- 150 Line 56: Various sources of NMPs in the UT exist, but they are dominated by local production (...).

2. Line 79: a constant low pressure? According to the manuscript, the cpc pressure was regulated but not constant. Or does it set at a constant pressure for each flight? Please be clearer here.

Many thanks, this was indeed not formulated concisely. We changed the respective lines:

- 155 A pressure regulation system with a critical orifice ensures a low pressure in the system. The set point was adjusted according to the flight pattern and therefore varied between 200 hPa and 350 hPa.

3. Table 1: might need to list the constants used in the Antoine equation for Butanol and FC-43, and the corresponding references.

- 160 The Antoine equations for Butanol and FC-43 as well as the used constant are now included into the Appendix A of the revised manuscript.

## Appendix A: Antoine equation

- 165 To calculate the vapor pressure  $p_{\text{vap}}$  of butanol in the CPC, we used the following equation with the corresponding parameters  $b = 46.78$  and  $c = 11.26$  (Baron & Willeke, 2001), where  $T$  is given in Kelvin and can be replaced by the CPC temperatures  $T_{\text{sat}}$  and  $T_{\text{con}}$ .

$$\log_{10}(p_{\text{vap}}) = \frac{-52.3 \cdot b}{T} + c \quad (1)$$

For the vapor pressure of FC-43 dependent on the saturator and condenser temperature, the following equation was used (Baron & Willeke, 2001; 3M, 2019):

$$\log_{10}(p_{\text{vap}}) = a - \frac{b}{T} \quad (2)$$

- 170 Here the parameters  $a$  and  $b$  are determined to 10.511 and 2453, respectively (3M, 2019).

4. Line 164: "a low and constant pressure", was the pressure here meant for P1 or P2? Need to clarify here.

Line 170: (...) to maintain a low and constant pressure at P1.

175 5. *Figure 1: Incomplete information, for example, the label of the IDP-3 pump is missing.*

Thanks for the thorough examination of the figures! In this case we added the label “IDP-3” to the pump and also changed the description “inlet” into “Common inlet”.

180 6. *Mentioned the full name of the TPEX campaign multiple times in the manuscript (i.e., line 26, line 80, and line 170); only needs to mention the full name once to reduce redundancy.*

Thanks. We kept the full name in the abstract (line 26) and removed it in line 81 and 176. We also deleted “TPEX campaign” several times in the script (e.g. line 144, line 317 etc.).

7. *Figure 2: For the cold reservoir of alpha pinene—shouldn’t the left tube insert deeper than the right tube?*

185 Actually, there are no tubes at all that reach fully into the alpha pinene reservoir. Because this was not correctly represented in Figure 2, we changed the schematic accordingly and removed the tubes.

190 8. *Line 587-589: “We tentatively propose that altering diffusion rates in combination with the long mc-CPC inlet lines could have caused the dropping CPC performance with decreasing pressures.” Was it “decreasing pressure” or “increasing pressure”? Was the “dropping CPC performance” meant the deviated size cuts at increasing pressure for channel 3 (Fig. 8a)?*

195 With this we were referring to the pressure range between 200 and 400 hPa where all three channels show a similar behavior; lower counting efficiencies and larger cutoff diameters with decreasing pressures. Still, as this explanation could be also the reason for the dropping channel 3 performance at higher pressures, we added the following:

200 We tentatively propose that altering diffusion rates in combination with the relatively long mc-CPC inlet lines could have caused the dropping CPC performance for all three channels with decreasing pressures in the range of 200 hPa to 400 hPa. However, also the increasing cutoff sizes observed for channel 3 at  $p_{CPC} > 400$  hPa could be a result of varying diffusion rates.

9. *Line 730: a typo here: varied → varied*

We changed “varied” to “varied”.

205 10. *Line 744: The CPC flow is lower at 200 hpa, which is a typical operating pressure of the mc-CPC. However, here the outstanding behavior at 200 hpa was simply ignored. Has the sample flow at this pressure been measured more than once? Is this a consistent behavior? If so, I don't think this behavior can just be dismissed from the calculation of the correction factor.*

Please see our answer to comment #5 in the “main comments” section.

210

## References

3M Safety data sheet: 3M™ Fluorinert™ Electronic Liquid FC-43. <https://multimedia.3m.com> [Accessed 11 July 2025], 2019.

215 Baron, P.A. & Willeke, K. Aerosol measurement: *principles, techniques, and applications*, 20th edition. Wiley-Interscience: New York, XXIII, 1131 pp, 2001.

Curtius, J., Heinritzi, M., Beck, L.J., Pöhlker, M.L., Tripathi, N. & Krumm, B.E. et al. Isoprene nitrates drive new particle formation in Amazon's upper troposphere. *Nature*, 636(8041), 124–130. <https://doi.org/10.1038/s41586-024-08192-4>, 2024.

220 Kupc, A., Williamson, C.J., Hodshire, A.L., Kazil, J., Ray, E. & Bui, T.P. et al. The potential role of organics in new particle formation and initial growth in the remote tropical upper troposphere. *Atmospheric Chemistry and Physics*, 20(23), 15037–15060. <https://doi.org/10.5194/acp-20-15037-2020>, 2020.
